# Supplementary material
Source: PubMed Central journal article supplement (PMC3368506)
Supplement: NIHMS369321-supplement-1_si_001.pdf [file NIHMS369321-supplement-1_si_001.pdf]

# Bifunctional Compounds for Controlling Metal-Mediated Aggregation of the A $\beta$ <sub>42</sub> Peptide

Anuj K. Sharma,<sup>a</sup> Stephanie T. Pavlova,<sup>a</sup> Jaekwang Kim,<sup>b</sup> Darren Finkelstein,<sup>a</sup> Nicholas J. Hawco,<sup>a</sup> Nigam P. Rath,<sup>c</sup> Jungsu Kim,<sup>b</sup> Liviu M. Mirica<sup>a\*</sup>

<sup>a</sup>Department of Chemistry, Washington University, One Brookings Drive, St. Louis, Missouri 63130-4899

<sup>b</sup>Department of Neurology, Washington University School of Medicine, St. Louis, Missouri 63108 and

<sup>c</sup>Department of Chemistry and Biochemistry, University of Missouri St. Louis, One University Boulevard, St. Louis, Missouri 63121-4400

## Table of Contents

|             |                                                                                           |     |
|-------------|-------------------------------------------------------------------------------------------|-----|
| <b>I</b>    | Crystal data and structure refinement parameters for complexes <b>1-4</b>                 | S2  |
| <b>II</b>   | Drug-like properties of L1 and L2                                                         | S3  |
| <b>III</b>  | Spectrophotometric Titrations                                                             |     |
|             | (a) Titration of L1 and Cu <sup>2+</sup>                                                  | S3  |
|             | (b) Titrations of L2 and Cu <sup>2+</sup>                                                 | S4  |
|             | (c) Titrations of L2 and Zn <sup>2+</sup>                                                 | S4  |
| <b>IV</b>   | Job's plots for solution stoichiometry determination                                      | S5  |
| <b>V</b>    | Absorption spectra of L1, L2, and their Cu <sup>2+</sup> and Zn <sup>2+</sup> complexes   | S8  |
| <b>VI</b>   | Fluorescence spectra of L1, L2, and their Cu <sup>2+</sup> and Zn <sup>2+</sup> complexes | S11 |
| <b>VII</b>  | ORTEP plots for <b>2</b> and <b>4</b>                                                     | S14 |
| <b>VIII</b> | A $\beta$ fibril binding affinities of ThT, L1, and L2                                    | S15 |
| <b>IX</b>   | ThT Fluorescence for inhibition of A $\beta$ aggregation by L1 and L2                     | S17 |
| <b>X</b>    | Peroxide production by A $\beta$ , Cu, and compounds                                      | S18 |
| <b>XI</b>   | Cell viability assays                                                                     | S19 |
| <b>XII</b>  | TEM and Western analysis of inhibition of A $\beta$ aggregation by L1 and L2              | S20 |
| <b>XIII</b> | X-ray structure data for:                                                                 |     |
|             | (a) [(L1)Cu] <sub>2</sub> (BPh <sub>4</sub> ) <sub>2</sub> ( <b>1</b> )                   | S21 |
|             | (b) [(L1)Zn] <sub>2</sub> (ClO <sub>4</sub> ) <sub>2</sub> ( <b>2</b> )                   | S22 |
|             | (c) [(L2) <sub>2</sub> Cu] ( <b>3</b> )                                                   | S25 |
|             | (d) [(L2) <sub>3</sub> Zn <sup>II</sup> <sub>3</sub> (O)](ClO <sub>4</sub> ) ( <b>4</b> ) | S25 |
| <b>XIV</b>  | Complete list of authors for references 8, 10, 44, 48, and 93                             | S26 |

I. **Table S1.** Crystal data and structure refinement parameters for complexes **1-4**.

| <b>compound</b>                                                     | <b>1</b>                                                                                                         | <b>2</b>                                                                                                            | <b>3</b>                                                                           | <b>4</b>                                                                                                            |
|---------------------------------------------------------------------|------------------------------------------------------------------------------------------------------------------|---------------------------------------------------------------------------------------------------------------------|------------------------------------------------------------------------------------|---------------------------------------------------------------------------------------------------------------------|
| formula                                                             | C <sub>108</sub> H <sub>95</sub> B <sub>2</sub><br>Cu <sub>2</sub> N <sub>11</sub> O <sub>4</sub> S <sub>2</sub> | C <sub>111</sub> H <sub>133</sub> Cl <sub>4</sub><br>N <sub>16</sub> O <sub>40</sub> S <sub>4</sub> Zn <sub>4</sub> | C <sub>44</sub> H <sub>40</sub> Cu<br>N <sub>6</sub> O <sub>4</sub> S <sub>2</sub> | C <sub>143</sub> H <sub>139</sub> Cl <sub>2</sub><br>N <sub>23</sub> O <sub>23</sub> S <sub>6</sub> Zn <sub>6</sub> |
| formula weight                                                      | 1823.77                                                                                                          | 2862.85                                                                                                             | 844.48                                                                             | 3203.25                                                                                                             |
| crystal system                                                      | Triclinic                                                                                                        | Monoclinic                                                                                                          | Monoclinic                                                                         | Cubic                                                                                                               |
| space group                                                         | <i>P</i> -1                                                                                                      | <i>P</i> 2 <sub>1</sub> / <i>n</i>                                                                                  | <i>P</i> 2 <sub>1</sub> / <i>c</i>                                                 | <i>Pa</i> -3                                                                                                        |
| <i>a</i> /Å                                                         | 13.3302(8)                                                                                                       | 24.378(2)                                                                                                           | 17.176(7)                                                                          | 24.3490(9)                                                                                                          |
| <i>b</i> /Å                                                         | 14.5868(10)                                                                                                      | 20.8777(16)                                                                                                         | 11.301(4)                                                                          | 24.3490(9)                                                                                                          |
| <i>c</i> /Å                                                         | 23.7796(17)                                                                                                      | 26.115(2)                                                                                                           | 10.045(4)                                                                          | 24.3490(9)                                                                                                          |
| $\alpha$ /deg                                                       | 92.590(3)                                                                                                        | 90.00                                                                                                               | 90.00                                                                              | 90.00                                                                                                               |
| $\beta$ /deg                                                        | 93.906(3)                                                                                                        | 102.489(3)                                                                                                          | 96.726(11) <sup>o</sup>                                                            | 90.00                                                                                                               |
| $\gamma$ /deg                                                       | 103.155(3)                                                                                                       | 90.00                                                                                                               | 90.00                                                                              | 90.00                                                                                                               |
| <i>V</i> /Å <sup>3</sup>                                            | 4483.3(5)                                                                                                        | 12976.9(19)                                                                                                         | 1936.6(13)                                                                         | 14435.9(9)                                                                                                          |
| <i>Z</i>                                                            | 2                                                                                                                | 4                                                                                                                   | 2                                                                                  | 4                                                                                                                   |
| <i>D</i> <sub>c</sub> /g cm <sup>-3</sup>                           | 1.351                                                                                                            | 1.465                                                                                                               | 1.448                                                                              | 1.474                                                                                                               |
| $\mu$ /mm <sup>-1</sup>                                             | 0.584                                                                                                            | 0.963                                                                                                               | 0.725                                                                              | 1.181                                                                                                               |
| <i>F</i> <sub>000</sub>                                             | 1984                                                                                                             | 5932                                                                                                                | 878                                                                                | 6608                                                                                                                |
| Temp. (K)                                                           | 100 (2)                                                                                                          | 100 (2)                                                                                                             | 100 (2)                                                                            | 100 (2)                                                                                                             |
| data/ restraints/<br>parameter                                      | 18400/1221                                                                                                       | 24282/1658                                                                                                          | 3405/261                                                                           | 4277/311                                                                                                            |
| <i>R</i> <sub>1</sub> ( <i>I</i> > 2σ( <i>I</i> ) <sup>a</sup> )    | 0.0391                                                                                                           | 0.0664                                                                                                              | 0.0662                                                                             | 0.0923                                                                                                              |
| <i>wR</i> <sub>2</sub> (all data) <sup>b</sup>                      | 0.0841                                                                                                           | 0.1998                                                                                                              | 0.1918                                                                             | 0.3020                                                                                                              |
| GOF                                                                 | 1.011                                                                                                            | 1.125                                                                                                               | 1.048                                                                              | 1.014                                                                                                               |
| Largest diff.<br>peak and hole<br>(e <sup>-</sup> Å <sup>-3</sup> ) | 0.433,<br>-0.454                                                                                                 | 1.525,<br>-1.389                                                                                                    | 1.956,<br>-2.297                                                                   | 0.568,<br>-1.075                                                                                                    |

<sup>a</sup>  $R = \sum ||F_o| - |F_c|| / \sum |F_o|$

<sup>b</sup>  $R_w = [\sum w(|F_o| - |F_c|)^2 / \sum w(F_o)^2]^{1/2}$

## II. Table S2. Drug-like properties of L1 and L2.

| Properties | L1     | L2     | Lipinski's Rule <sup>a</sup> |
|------------|--------|--------|------------------------------|
| M.W.       | 468.5  | 391.5  | $\leq 450$                   |
| clogP      | 4.046  | 3.818  | $\leq 5$                     |
| HBD        | 1      | 1      | $\leq 5$                     |
| HBA        | 6      | 5      | $\leq 10$                    |
| PSA        | 71.38  | 58.48  | $\leq 90 \text{ \AA}^2$      |
| logBB      | -0.311 | -0.155 | $> -1$                       |

<sup>a</sup> MW: molecular weight; clogP: calculated logarithm of the octanol-water partition coefficient; HBD: hydrogen-bond donor atoms; HBA: hydrogen-bond acceptor atoms; PSA: polar surface area;  $\log BB = -0.0148 \times PSA + 0.152 \times \text{clogP} + 0.130$  (refs: (a) Lipinski, C. A.; Lombardo, F.; Dominy, B. W.; Feeney, P. J. *Adv. Drug Delivery Rev.* **1997**, *23*, 3-25; (b) Clark, D. E.; Pickett, S. D. *Drug Disc. Today* **2000**, *5*, 49-58).

## III. (a) Spectrophotometric titration for L1 and Cu

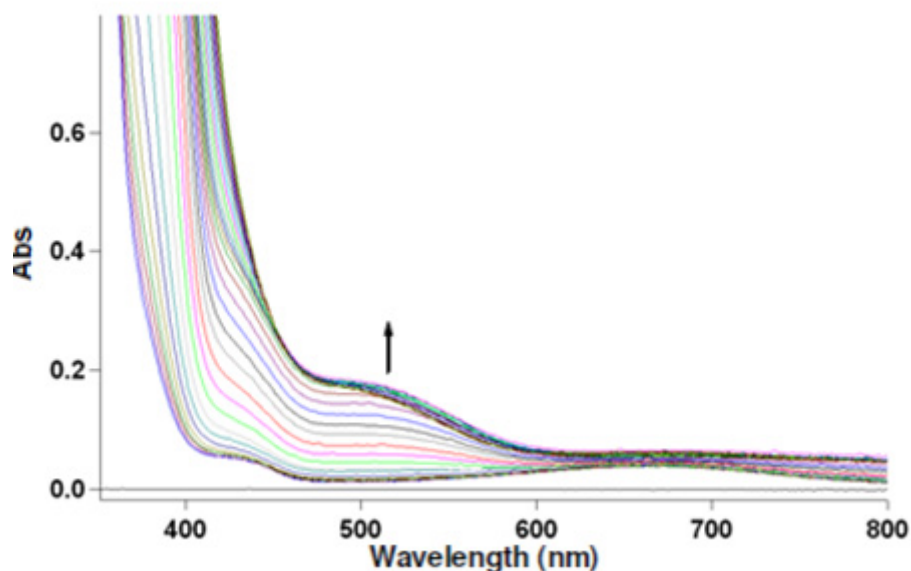

**Figure S1.** Variable pH-spectrophotometric titration for the L1-Cu<sup>2+</sup> system (MeOH-H<sub>2</sub>O (1:1), [L1] = [Cu] = 0.50 mM, I = 0.1 M NaCl).

**(b) Spectrophotometric titration for L2 and Cu<sup>2+</sup>**

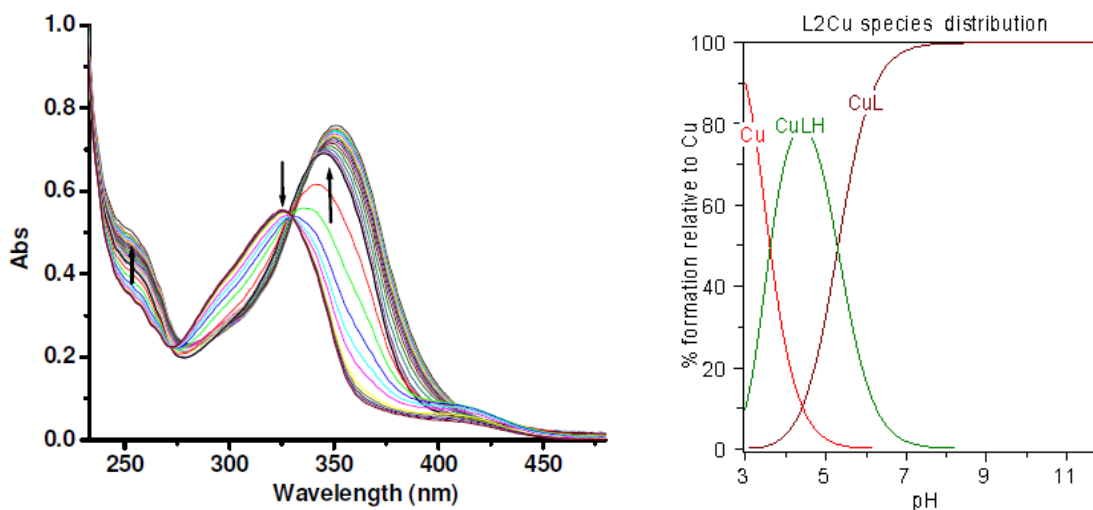

**Figure S2.** Variable pH (pH 3-11) UV spectra of L2 and Cu<sup>2+</sup> system ([L2] = [Cu<sup>2+</sup>] = 50 μM, 25 °C, *I* = 0.1 M NaCl) and species distribution plot.

**(c) Spectrophotometric titration for L2 and Zn<sup>2+</sup>**

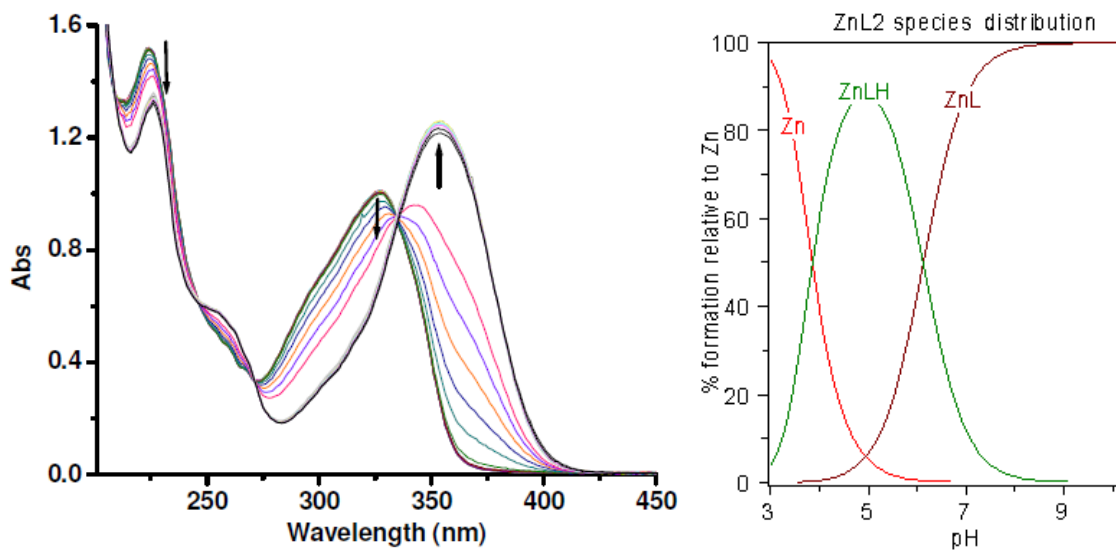

**Figure S3.** Variable pH (pH 3-11) UV spectra of L2 and Zn<sup>2+</sup> system ([L2] = [Zn<sup>2+</sup>] = 50 μM, 25 °C, *I* = 0.1 M NaCl) and species distribution plot.

#### IV. Job's plots for solution stoichiometry determination

L1 with Cu:

(a)

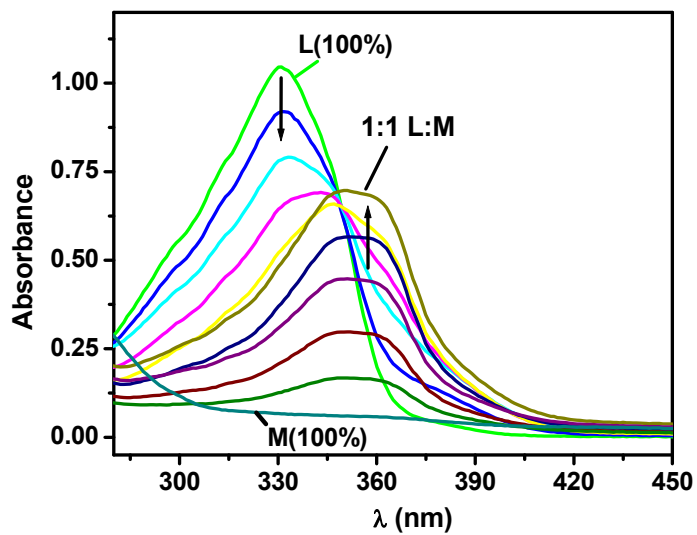

(b)

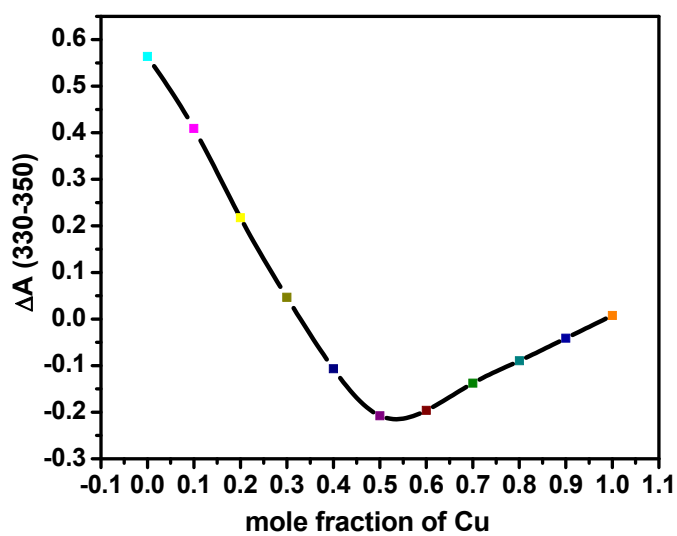

Figure S4. (a) Spectra and (b) Job's plot for L1 and Cu<sup>2+</sup> in MeCN.

L1 with Zn:

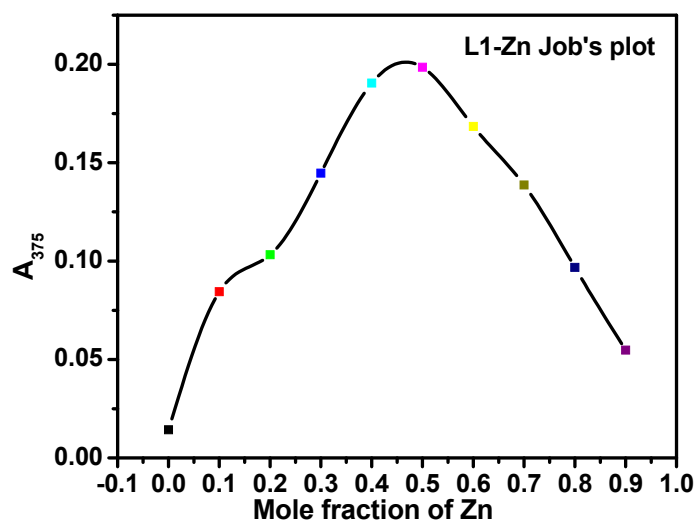

Figure S5. Job's plot for L1 and Zn<sup>2+</sup> in MeCN.

L2 with Cu:

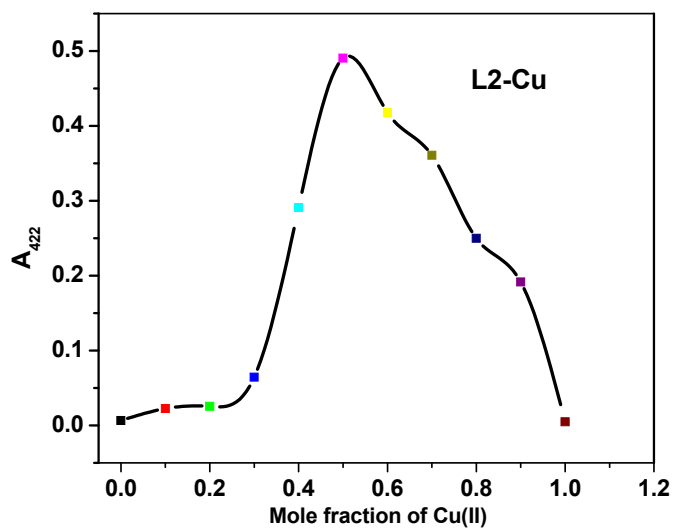

Figure S6. Job's plot for L2 and Cu<sup>2+</sup> in MeCN.

L2 with Zn:

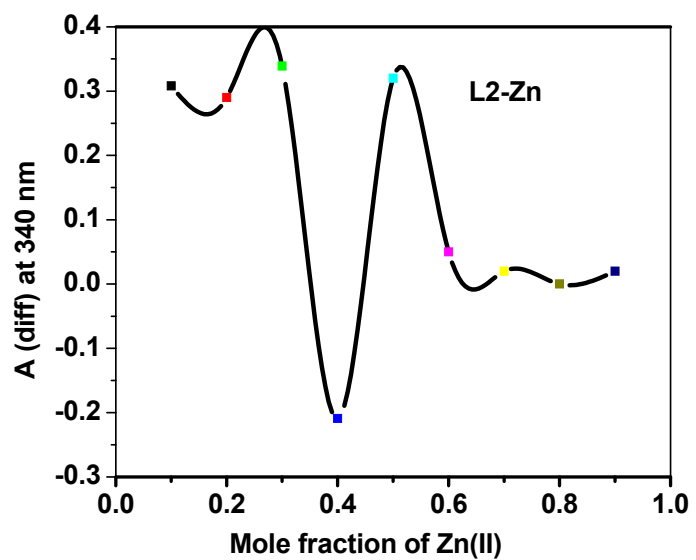

Figure S7. Job's plot for L2 and Zn<sup>2+</sup> in MeCN.

V. Absorption spectra of L1, L2, and their  $\text{Cu}^{2+}$  and  $\text{Zn}^{2+}$  complexes

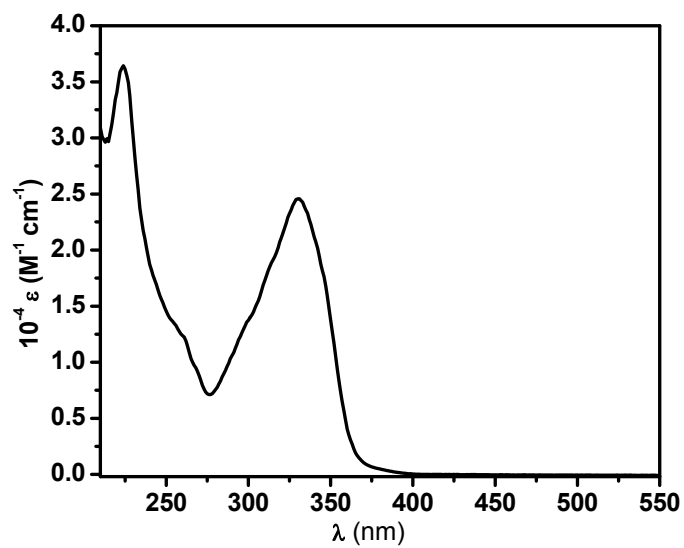

Figure S8. Absorption spectrum of L1 in MeCN.

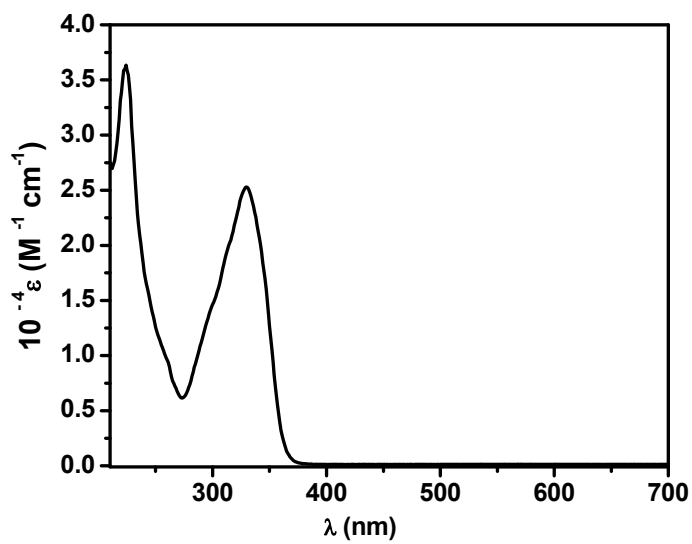

Figure S9. Absorption spectrum of L2 in MeCN.



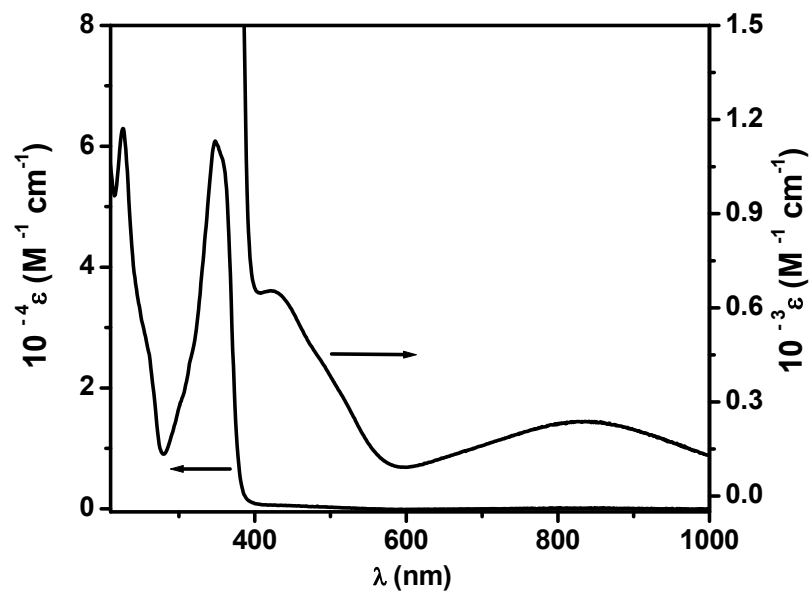

Figure S10. Absorption spectrum of 1 in MeCN.

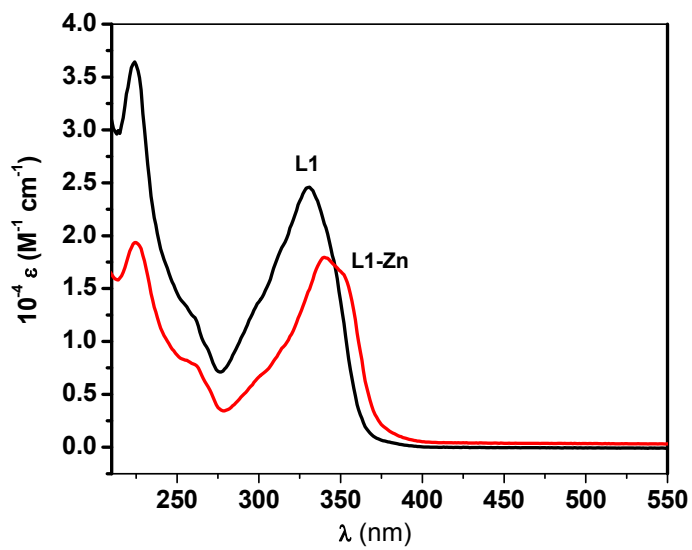

Figure S11. Absorption spectra of L1 and 2 in MeCN.

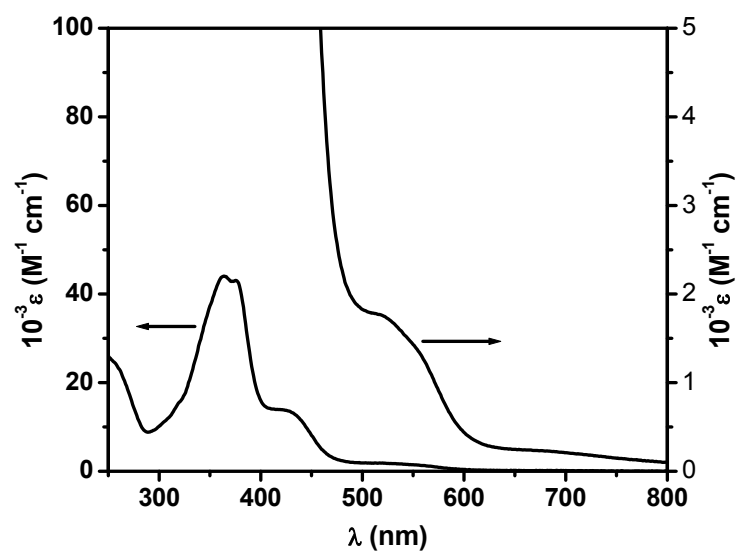

**Figure S12.** Absorption spectrum of **3** in  $\text{CH}_2\text{Cl}_2$ .

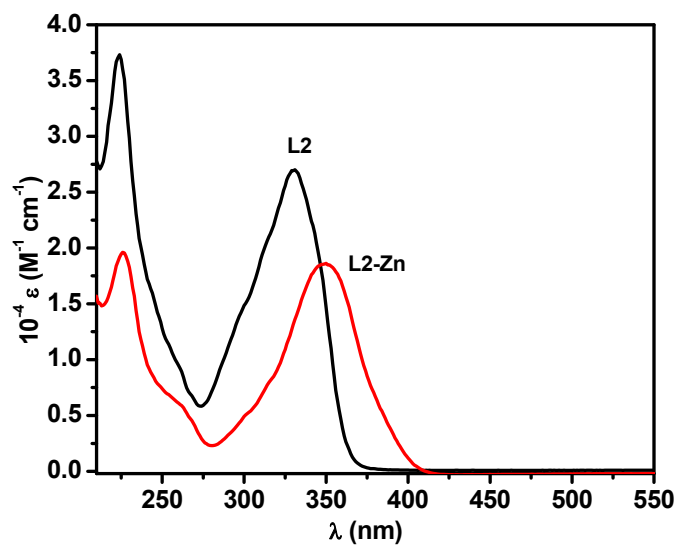

**Figure S13.** Absorption spectra of L2 and **4** in MeCN.

VI. Fluorescence spectra of L1, L2, and their Cu<sup>2+</sup> and Zn<sup>2+</sup> complexes

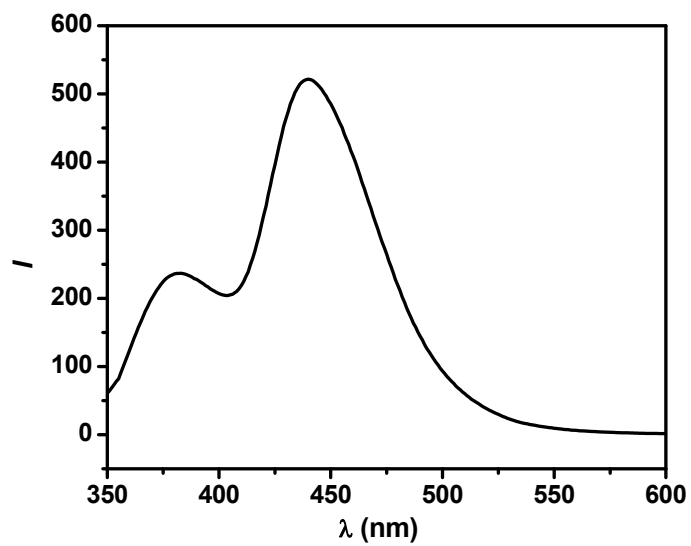

**Figure S14.** Fluorescence spectrum of L1 in MeCN ( $\lambda_{\text{ex}} = 330$  nm).

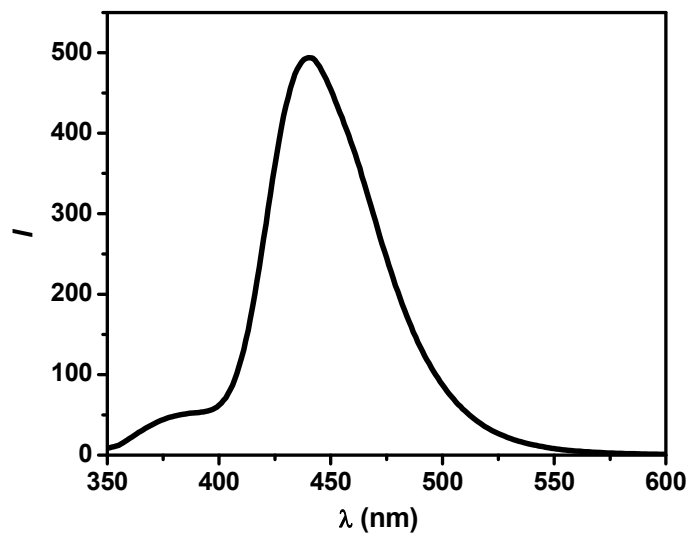

**Figure S15.** Fluorescence spectrum of L2 in MeCN ( $\lambda_{\text{ex}} = 330$  nm).

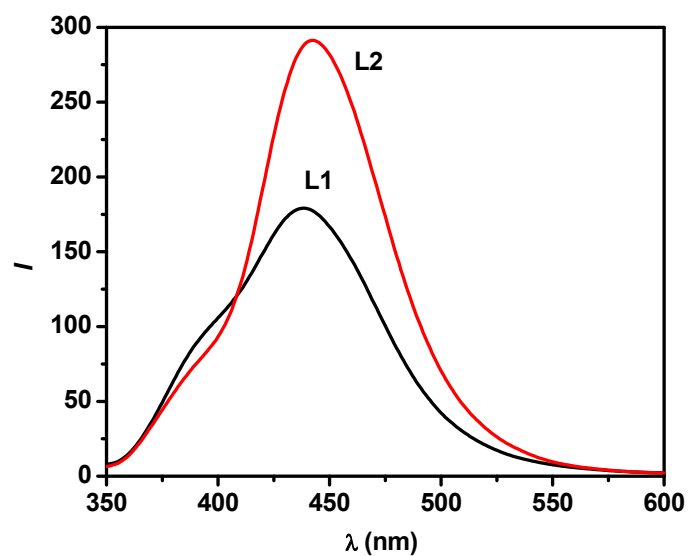

**Figure S16.** Fluorescence spectra of L1 and L2 in PBS ( $\lambda_{\text{ex}} = 330$  nm).

### Fluorescence spectra of $\text{Cu}^{2+}$ and $\text{Zn}^{2+}$ complexes of L1 and L2

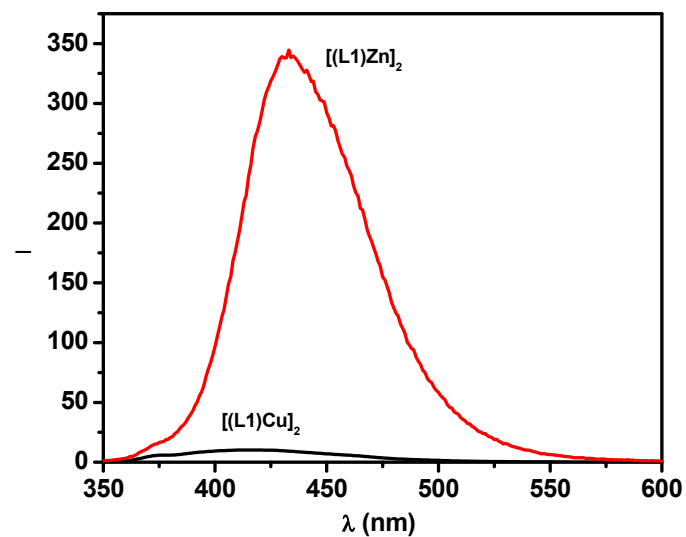

**Figure S17.** Fluorescence spectra of **1** and **2** in PBS ( $\lambda_{\text{ex}} = 330$  nm).

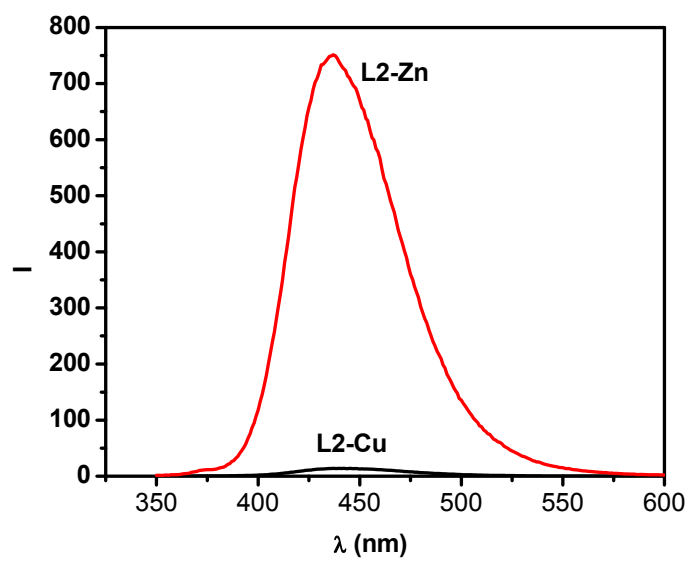

**Figure S18.** Fluorescence spectra of **3** and **4** in PBS ( $\lambda_{\text{ex}}$  330 nm).

## VII. ORTEP plots for 2 and 4

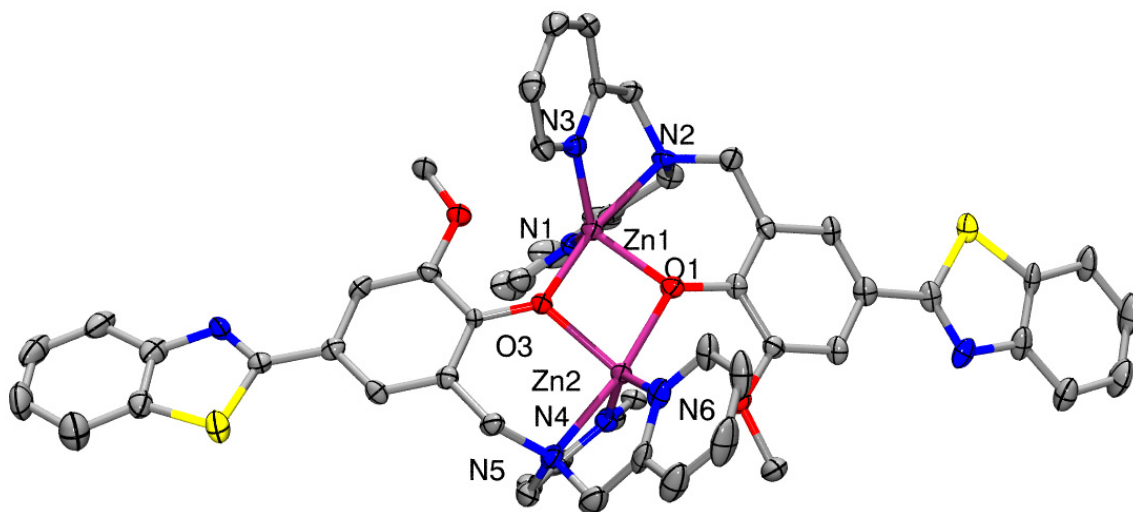

**Figure S19.** ORTEP plot of **2** with 30% thermal ellipsoids. Only one of the two unique molecules is shown; all hydrogen atoms, counteranions, and solvent molecules are omitted for clarity.

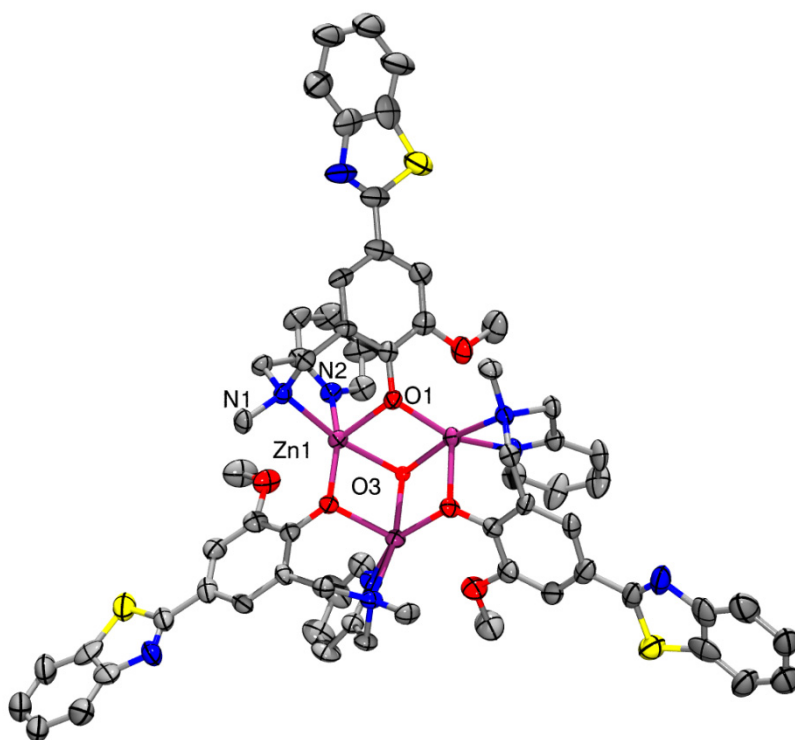

**Figure S20.** ORTEP view of **4** with 30% probability ellipsoids. All hydrogen atoms, counteranions, and solvent molecules are omitted for clarity.

### VIII. $A\beta$ fibril binding affinities of ThT, L1, and L2

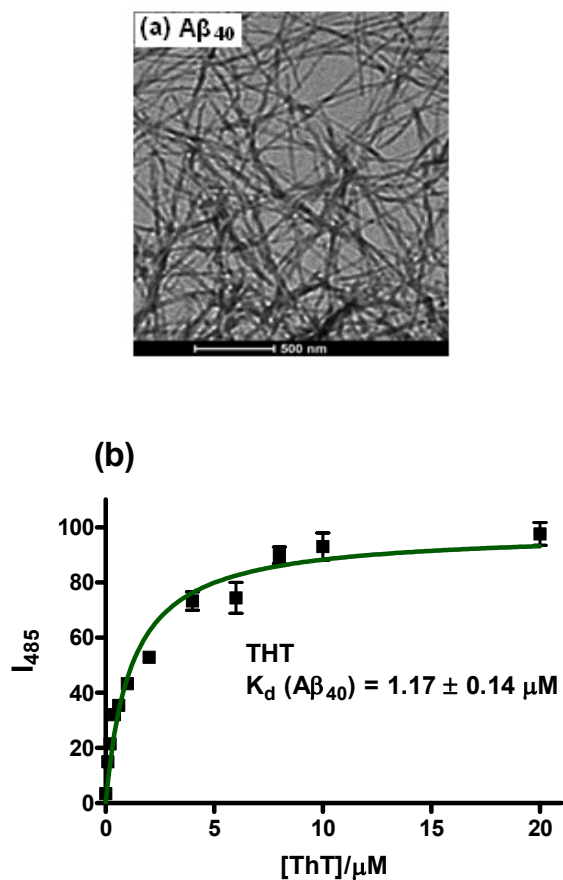

**Figure S21.** (a) TEM image of  $A\beta_{40}$  fibrils; (b) Fluorescence assay of ThT binding to  $A\beta_{40}$  fibrils (5  $\mu M$ , PBS).

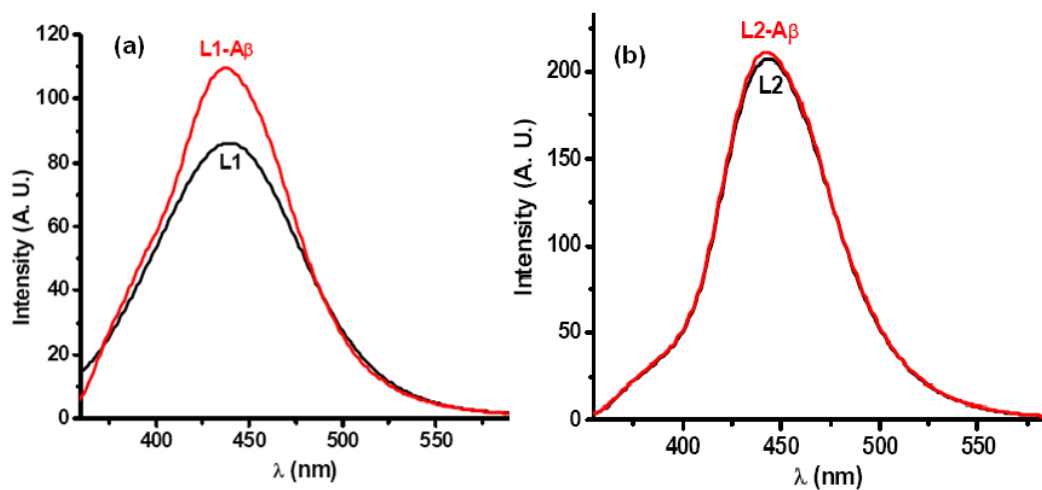

**Figure S22.** Change in fluorescence intensity of (a) L1 and (b) L2 with  $A\beta$  fibrils ( $[A\beta] = [L] = 2 \mu M$ , PBS).

## Affinity of L1 and L2 for Zn-A $\beta$ fibrils

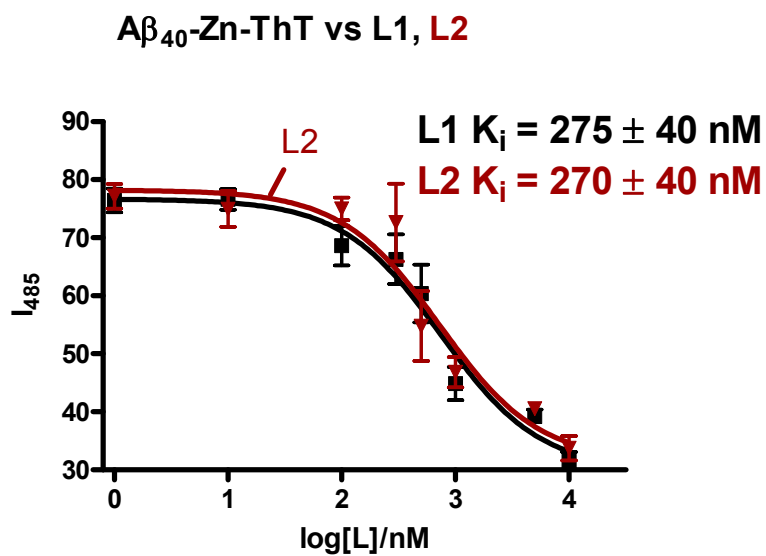

**Figure S23.** ThT fluorescence competition assays of L1 and L2 with A $\beta$ <sub>40</sub> fibrils ( $[A\beta] = [Zn^{+2}] = 5 \mu\text{M}$ ,  $[ThT] = 2 \mu\text{M}$ , PBS).



IX. ThT Fluorescence of inhibition of A $\beta$  aggregation by L1 and L2

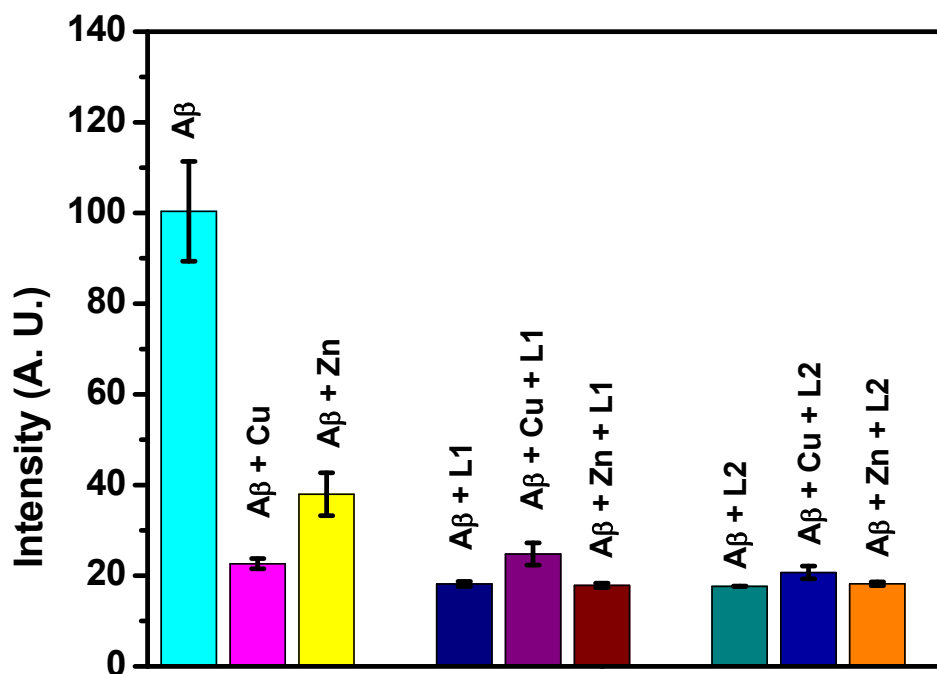

**Figure 24.** Normalized ThT fluorescence of inhibition of A $\beta$  fibrillization, measured upon incubation at 37 °C for 24h. Samples are as indicated on top of lanes (PBS, [A $\beta$ ] = 25  $\mu$ M; [M<sup>2+</sup>] = 25  $\mu$ M; [compound] = 50  $\mu$ M).

## X. Peroxide production by A $\beta$ , Cu, and compounds

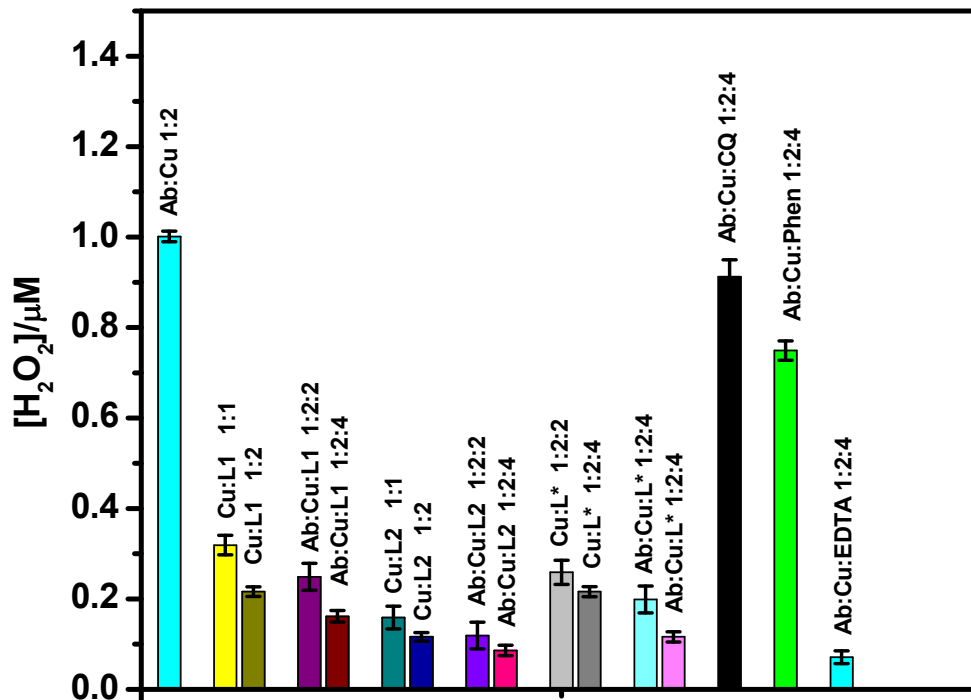

**Figure S25.** Normalized amounts of H<sub>2</sub>O<sub>2</sub> produced in presence of A $\beta$ , Cu, compounds, and sodium ascorbate, as determined by the Amplex-Red assay. [A $\beta$ ] = 200 nM, [Cu<sup>II</sup>] = 400 nM, [chelator] = 400 or 800 nM, [ascorbate] = 10  $\mu$ M, [Amplex-Red] = 50 nM, [HRP] = 0.1 U/mL.  $\lambda_{\text{ex/em}}$  = 530/590 nm. Abbreviations: L\* = *N*-methyl-*N,N*-bis(2-pyridylmethyl)amine, CQ = clioquinol, phen = phenanthroline, EDTA = ethylenediaminetetraacetic acid.

## XI. Cell viability assays for L1, L2, EDTA, and CQ

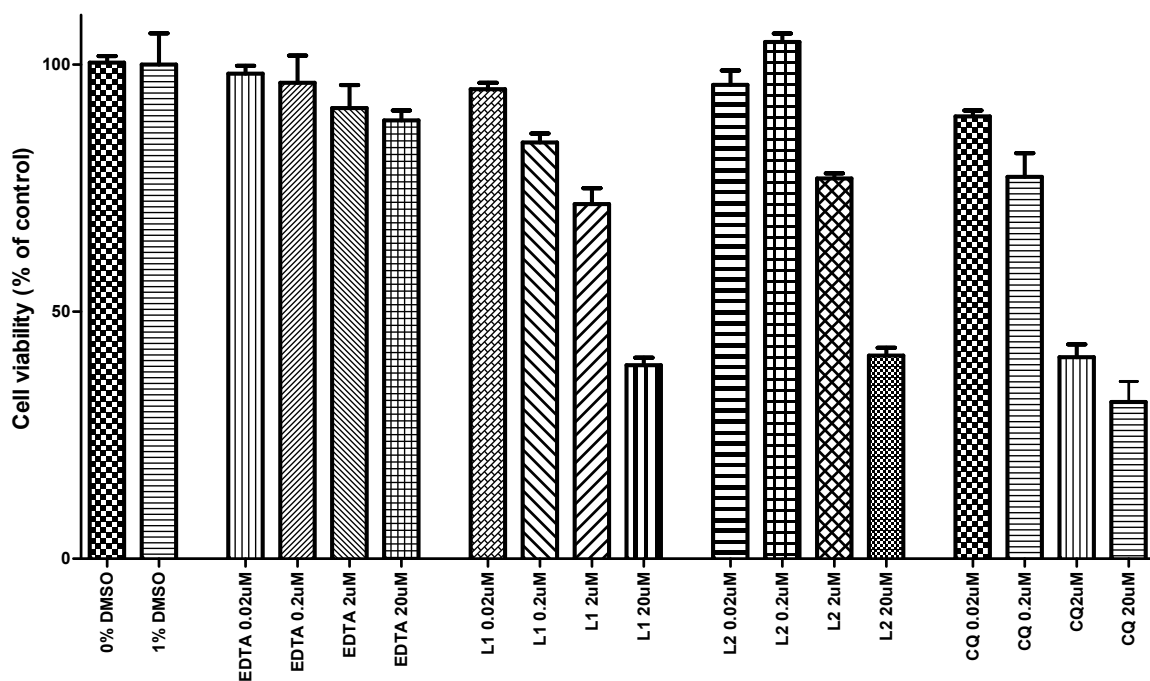

**Figure S26.** Cell viability (% control) upon incubation of Neuro2A cells with EDTA, L1, L2, and CQ without adding  $A\beta_{42}$ .

## XII. TEM and Western analysis of inhibition of A $\beta$ <sub>42</sub> aggregation by L1 and L2

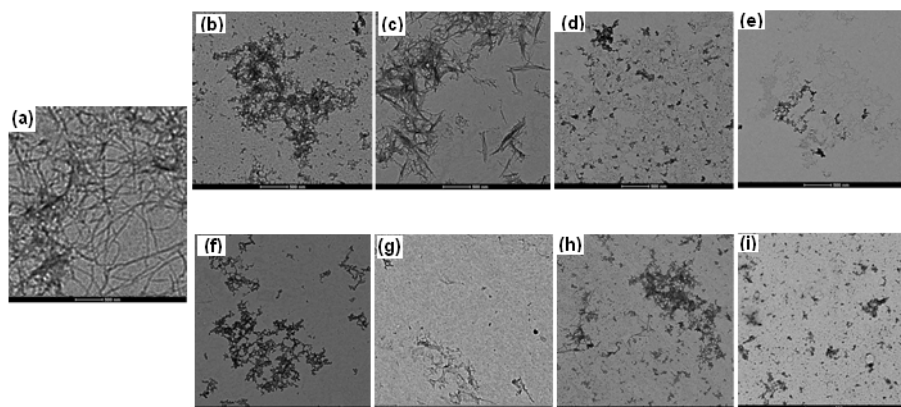

**Figure S27.** TEM images of the inhibition of A $\beta$ <sub>42</sub> aggregation by substoichiometric L1 and L2, in the presence or absence of metal ions ( $[A\beta_{42}] = [Cu^{2+}] = 25 \mu M$ ,  $[compound] = 2$  or  $10 \mu M$ ,  $37^\circ C$ , 24 h, scale bar = 500 nm). Samples: (a) A $\beta$ <sub>42</sub>; (b) A $\beta$ <sub>42</sub> + L1 (2  $\mu M$ ); (c) A $\beta$ <sub>42</sub> + L1 (10  $\mu M$ ); (d) A $\beta$ <sub>42</sub> + L1 (2  $\mu M$ ) +  $Cu^{2+}$ ; (e) A $\beta$ <sub>42</sub> + L1 (10  $\mu M$ ) +  $Cu^{2+}$ ; (f) A $\beta$ <sub>42</sub> + L2 (2  $\mu M$ ); (g) A $\beta$ <sub>42</sub> + L2 (10  $\mu M$ ); (h) A $\beta$ <sub>42</sub> + L2 (2  $\mu M$ ) +  $Cu^{2+}$ ; (i) A $\beta$ <sub>42</sub> + L2 (10  $\mu M$ ) +  $Cu^{2+}$ .

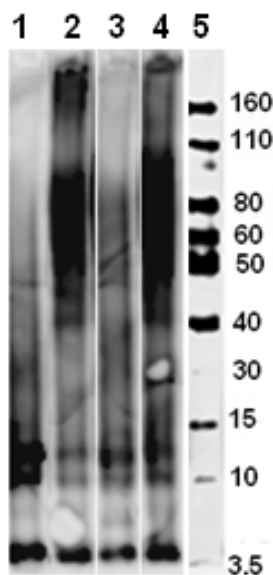

**Figure S28.** Native gel/Western blot analysis for the inhibition of A $\beta$ <sub>42</sub> aggregation by substoichiometric L2, in the presence or absence of metal ions ( $[A\beta_{42}] = [Cu^{2+}] = 25 \mu M$ ,  $[L2] = 2$  or  $10 \mu M$ ,  $37^\circ C$ , 24 h) (1) A $\beta$ <sub>42</sub> + L2 (2  $\mu M$ ); (2) A $\beta$ <sub>42</sub> + L2 (2  $\mu M$ ) +  $Cu^{2+}$ ; (3) A $\beta$ <sub>42</sub> + L2 (10  $\mu M$ ); (4) A $\beta$ <sub>42</sub> + L2 (10  $\mu M$ ) +  $Cu^{2+}$ ; (5) MW marker. Lanes 1-4 correspond to panels f-i in Fig S27, respectively.

**XIII. X-ray structure data for [(L1)Cu]<sub>2</sub>(BPh<sub>4</sub>)<sub>2</sub> (1), [(L1)Zn]<sub>2</sub>(ClO<sub>4</sub>)<sub>2</sub> (2), [(L2)<sub>2</sub>Cu] (3), and [(L2)<sub>3</sub>Zn<sup>II</sup><sub>3</sub>(O)] (ClO<sub>4</sub>) (4)**

**Table S3. Bond lengths [Å] and angles [°] for [(L1)Cu]<sub>2</sub>(BPh<sub>4</sub>)<sub>2</sub> (1)**

|                 |            |
|-----------------|------------|
| Cu(1)-N(1)      | 2.0024(19) |
| Cu(1)-N(2)      | 2.0179(18) |
| Cu(1)-N(3)      | 2.022(2)   |
| Cu(1)-O(1)      | 2.1260(16) |
| Cu(1)-O(3)      | 1.9357(16) |
| Cu(2)-O(1)      | 1.9397(15) |
| Cu(2)-N(5)      | 1.985(2)   |
| Cu(2)-N(6)      | 2.0281(19) |
| Cu(2)-N(7)      | 1.992(2)   |
| Cu(2)-O(3)      | 2.1479(16) |
| O(3)-Cu(1)-N(1) | 95.18(7)   |
| O(3)-Cu(1)-N(2) | 168.53(7)  |
| N(1)-Cu(1)-N(2) | 82.31(8)   |
| O(3)-Cu(1)-N(3) | 105.13(7)  |
| N(1)-Cu(1)-N(3) | 142.03(8)  |
| N(2)-Cu(1)-N(3) | 83.18(8)   |
| O(3)-Cu(1)-O(1) | 79.97(6)   |
| N(1)-Cu(1)-O(1) | 112.90(7)  |
| N(2)-Cu(1)-O(1) | 90.65(7)   |
| N(3)-Cu(1)-O(1) | 102.16(7)  |
| O(1)-Cu(2)-N(5) | 102.75(7)  |
| O(1)-Cu(2)-N(7) | 94.32(8)   |
| N(5)-Cu(2)-N(7) | 150.26(9)  |
| O(1)-Cu(2)-N(6) | 169.75(7)  |
| N(5)-Cu(2)-N(6) | 84.24(8)   |
| N(7)-Cu(2)-N(6) | 82.63(8)   |
| O(1)-Cu(2)-O(3) | 79.33(6)   |
| N(5)-Cu(2)-O(3) | 105.71(7)  |
| N(7)-Cu(2)-O(3) | 101.23(7)  |
| N(6)-Cu(2)-O(3) | 91.62(7)   |

**Table S4. Bond lengths [Å] and angles [°] for [(L1)Zn]<sub>2</sub>(ClO<sub>4</sub>)<sub>2</sub> (2)**

|                 |           |
|-----------------|-----------|
| Zn(1)-N(3)      | 2.025(6)  |
| Zn(1)-O(1)      | 2.032(5)  |
| Zn(1)-O(3)      | 2.048(5)  |
| Zn(1)-N(1)      | 2.066(6)  |
| Zn(1)-N(2)      | 2.210(5)  |
| Zn(1)-Zn(2)     | 3.085(1)  |
| Zn(2)-O(1)      | 2.016(5)  |
| Zn(2)-N(6)      | 2.037(6)  |
| Zn(2)-O(3)      | 2.055(5)  |
| Zn(2)-N(4)      | 2.069(6)  |
| Zn(2)-N(5)      | 2.170(6)  |
| Zn(2)-O(2)      | 2.446(5)  |
| Zn(3)-O(7)      | 2.030(5)  |
| Zn(3)-O(5)      | 2.031(5)  |
| Zn(3)-N(9)      | 2.043(6)  |
| Zn(3)-N(11)     | 2.056(7)  |
| Zn(3)-N(10)     | 2.206(6)  |
| Zn(3)-Zn(4)     | 3.070(1)  |
| Zn(4)-O(5)      | 2.030(5)  |
| Zn(4)-N(12)     | 2.034(6)  |
| Zn(4)-O(7)      | 2.042(5)  |
| Zn(4)-N(14)     | 2.046(6)  |
| Zn(4)-N(13)     | 2.193(6)  |
| N(3)-Zn(1)-O(1) | 111.9(2)  |
| N(3)-Zn(1)-O(3) | 99.9(2)   |
| O(1)-Zn(1)-O(3) | 78.97(18) |
| N(3)-Zn(1)-N(1) | 129.2(2)  |
| O(1)-Zn(1)-N(1) | 113.5(2)  |
| O(3)-Zn(1)-N(1) | 109.9(2)  |
| N(3)-Zn(1)-N(2) | 79.8(2)   |

|                  |            |
|------------------|------------|
| O(1)-Zn(1)-N(2)  | 89.1(2)    |
| O(3)-Zn(1)-N(2)  | 167.1(2)   |
| N(1)-Zn(1)-N(2)  | 79.3(2)    |
| N(3)-Zn(1)-Zn(2) | 121.67(17) |
| O(1)-Zn(1)-Zn(2) | 40.18(13)  |
| O(3)-Zn(1)-Zn(2) | 41.34(13)  |
| N(1)-Zn(1)-Zn(2) | 107.63(16) |
| N(2)-Zn(1)-Zn(2) | 128.21(16) |
| O(1)-Zn(2)-N(6)  | 102.3(2)   |
| O(1)-Zn(2)-O(3)  | 79.15(18)  |
| N(6)-Zn(2)-O(3)  | 114.6(2)   |
| O(1)-Zn(2)-N(4)  | 103.3(2)   |
| N(6)-Zn(2)-N(4)  | 140.5(2)   |
| O(3)-Zn(2)-N(4)  | 99.4(2)    |
| O(1)-Zn(2)-N(5)  | 170.7(2)   |
| N(6)-Zn(2)-N(5)  | 79.5(2)    |
| O(3)-Zn(2)-N(5)  | 91.8(2)    |
| N(4)-Zn(2)-N(5)  | 80.0(2)    |
| O(1)-Zn(2)-O(2)  | 71.23(17)  |
| N(6)-Zn(2)-O(2)  | 79.3(2)    |
| O(3)-Zn(2)-O(2)  | 149.56(17) |
| N(4)-Zn(2)-O(2)  | 81.1(2)    |
| N(5)-Zn(2)-O(2)  | 118.02(19) |
| O(1)-Zn(2)-Zn(1) | 40.55(14)  |
| N(6)-Zn(2)-Zn(1) | 124.98(19) |
| O(3)-Zn(2)-Zn(1) | 41.16(13)  |
| N(4)-Zn(2)-Zn(1) | 93.71(16)  |
| N(5)-Zn(2)-Zn(1) | 131.20(16) |
| O(2)-Zn(2)-Zn(1) | 108.45(11) |
| O(7)-Zn(3)-O(5)  | 79.03(19)  |
| O(7)-Zn(3)-N(9)  | 102.1(2)   |

|                   |            |
|-------------------|------------|
| O(5)-Zn(3)-N(9)   | 114.5(2)   |
| O(7)-Zn(3)-N(11)  | 107.0(2)   |
| O(5)-Zn(3)-N(11)  | 106.6(2)   |
| N(9)-Zn(3)-N(11)  | 133.1(3)   |
| O(7)-Zn(3)-N(10)  | 168.7(2)   |
| O(5)-Zn(3)-N(10)  | 90.1(2)    |
| N(9)-Zn(3)-N(10)  | 79.3(3)    |
| N(11)-Zn(3)-N(10) | 79.0(2)    |
| O(7)-Zn(3)-Zn(4)  | 41.22(14)  |
| O(5)-Zn(3)-Zn(4)  | 40.88(13)  |
| N(9)-Zn(3)-Zn(4)  | 125.9(2)   |
| N(11)-Zn(3)-Zn(4) | 99.87(19)  |
| N(10)-Zn(3)-Zn(4) | 129.22(16) |
| O(5)-Zn(4)-N(12)  | 101.8(2)   |
| O(5)-Zn(4)-O(7)   | 78.78(18)  |
| N(12)-Zn(4)-O(7)  | 113.6(2)   |
| O(5)-Zn(4)-N(14)  | 106.9(2)   |
| N(12)-Zn(4)-N(14) | 132.9(2)   |
| O(7)-Zn(4)-N(14)  | 108.2(2)   |
| O(5)-Zn(4)-N(13)  | 168.0(2)   |
| N(12)-Zn(4)-N(13) | 79.1(2)    |
| O(7)-Zn(4)-N(13)  | 89.9(2)    |
| N(14)-Zn(4)-N(13) | 80.1(2)    |
| O(5)-Zn(4)-Zn(3)  | 40.91(13)  |
| N(12)-Zn(4)-Zn(3) | 124.90(17) |
| O(7)-Zn(4)-Zn(3)  | 40.93(13)  |
| N(14)-Zn(4)-Zn(3) | 100.83(18) |
| N(13)-Zn(4)-Zn(3) | 129.20(15) |



**Table S5. Bond lengths [Å] and angles [°] for [(L2)<sub>2</sub>Cu] (3)**

|                     |            |
|---------------------|------------|
| Cu(1)-N(1)          | 2.563(5)   |
| Cu(1)-O(1)          | 1.956(4)   |
| Cu(1)-N(2)          | 2.102(4)   |
| O(1)-Cu(1)-O(1)#1   | 180.0      |
| O(1)-Cu(1)-N(2)     | 91.87(16)  |
| O(1)#1-Cu(1)-N(2)   | 88.13(16)  |
| O(1)-Cu(1)-N(2)#1   | 88.13(16)  |
| O(1)#1-Cu(1)-N(2)#1 | 91.87(16)  |
| N(2)-Cu(1)-N(2)#1   | 179.999(1) |

**Table S6. Bond lengths [Å] and angles [°] for [(L2)<sub>3</sub>Zn<sup>II</sup><sub>3</sub>(O)](ClO<sub>4</sub>) (4)**

|                    |           |
|--------------------|-----------|
| Zn(1)-O(1)#1       | 1.932(6)  |
| Zn(1)-N(2)         | 2.026(7)  |
| Zn(1)-O(1)         | 2.064(6)  |
| Zn(1)-O(3)         | 2.142(4)  |
| Zn(1)-N(1)         | 2.165(7)  |
| O(1)#1-Zn(1)-N(2)  | 149.6(3)  |
| O(1)#1-Zn(1)-O(1)  | 114.3(3)  |
| N(2)-Zn(1)-O(1)    | 93.8(3)   |
| O(1)#1-Zn(1)-O(3)  | 79.42(19) |
| N(2)-Zn(1)-O(3)    | 97.2(3)   |
| O(1)-Zn(1)-O(3)    | 76.61(18) |
| O(1)#1-Zn(1)-N(1)  | 106.6(3)  |
| N(2)-Zn(1)-N(1)    | 83.3(3)   |
| O(1)-Zn(1)-N(1)    | 90.6(2)   |
| O(3)-Zn(1)-N(1)    | 167.2(2)  |
| C(1)-S(1)-C(7)     | 87.4(5)   |
| C(11)-O(1)-Zn(1)#2 | 127.7(5)  |
| C(11)-O(1)-Zn(1)   | 115.7(5)  |
| Zn(1)#2-O(1)-Zn(1) | 105.7(3)  |
| C(12)-O(2)-C(15)   | 118.1(8)  |
| Zn(1)#1-O(3)-Zn(1) | 96.1(2)   |

**XIV. Complete list of authors for references 8, 10, 44, 48, and 93.**

- (8) McGowan, E.; Pickford, F.; Kim, J.; Onstead, L.; Eriksen, J.; Yu, C.; Skipper, L.; Murphy, M. P.; Beard, J.; Das, P.; Jansen, K.; DeLucia, M.; Lin, W. L.; Dolios, G.; Wang, R.; Eckman, C. B.; Dickson, D. W.; Hutton, M.; Hardy, J.; Golde, T. *Neuron* **2005**, *47*, 191.
- (10) Kuperstein, I.; Broersen, K.; Benilova, I.; Rozenski, J.; Jonckheere, W.; Debulpaep, M.; Vandersteen, A.; Segers-Nolten, I.; Van Der Werf, K.; Subramaniam, V.; Braeken, D.; Callewaert, G.; Bartic, C.; D'Hooze, R.; Martins, I. C.; Rousseau, F.; Schymkowitz, J.; De Strooper, B. *EMBO J.* **2010**, *29*, 3408.
- (44) Cherny, R. A.; Atwood, C. S.; Xilinas, M. E.; Gray, D. N.; Jones, W. D.; McLean, C. A.; Barnham, K. J.; Volitakis, I.; Fraser, F. W.; Kim, Y. S.; Huang, X. D.; Goldstein, L. E.; Moir, R. D.; Lim, J. T.; Beyreuther, K.; Zheng, H.; Tanzi, R. E.; Masters, C. L.; Bush, A. I. *Neuron* **2001**, *30*, 665.
- (48) Adlard, P. A.; Cherny, R. A.; Finkelstein, D. I.; Gautier, E.; Robb, E.; Cortes, M.; Volitakis, I.; Liu, X.; Smith, J. P.; Perez, K.; Laughton, K.; Li, Q.-X.; Charman, S. A.; Nicolazzo, J. A.; Wilkins, S.; Deleva, K.; Lynch, T.; Kok, G.; Ritchie, C. W.; Tanzi, R. E.; Cappai, R.; Masters, C. L.; Barnham, K. J.; Bush, A. I. *Neuron* **2008**, *59*, 43.
- (92) Huang, X. D.; Cuajungco, M. P.; Atwood, C. S.; Hartshorn, M. A.; Tyndall, J. D. A.; Hanson, G. R.; Stokes, K. C.; Leopold, M.; Multhaup, G.; Goldstein, L. E.; Scarpa, R. C.; Saunders, A. J.; Lim, J.; Moir, R. D.; Glabe, C.; Bowden, E. F.; Masters, C. L.; Fairlie, D. P.; Tanzi, R. E.; Bush, A. I. *J. Biol. Chem.* **1999**, *274*, 37111.
